# Supplementary material for: Generating Virtual Short Tau Inversion Recovery (STIR) Images from T1- and T2-Weighted Images Using a Conditional Generative Adversarial Network in Spine Imaging
Source: MDPI journal article supplement (doi:10.3390/diagnostics11091542), 2021-08-25
Supplement: s1 [file s1]

# Supplementary Material

Supplementary Table S1. TE and TR relaxation times in ms (mean ± standard deviation).

| Scanner  | T1 TE      | T2 TE       | STIR TE     | T1 TR          | T2 TR           | STIR TR         |
|----------|------------|-------------|-------------|----------------|-----------------|-----------------|
| Aera     | 11.5 ± 0.9 | 107.0 ± 2.3 | 64.3 ± 5.6  | 533.9 ± 81.8   | 5207.0 ± 1011.6 | 4378.1 ± 672.4  |
| Avanto   | 13.1 ± 1.1 | 106.3 ± 4.9 | 72.6 ± 6.1  | 590.2 ± 64.8   | 4293.2 ± 568.3  | 5880.1 ± 973.2  |
| Skyra    | 11.2 ± 1.8 | 103.8 ± 9.8 | 64.0 ± 7.4  | 1032.0 ± 959.7 | 4546.1 ± 1250.1 | 4030.1 ± 1040.2 |
| Sonata   | 12.0 ± 0.0 | 108.0 ± 2.6 | 75.4 ± 1.5  | 488.9 ± 52.0   | 5397.1 ± 392.2  | 5674.3 ± 790.6  |
| Symphony | 13.8 ± 0.8 | 111.2 ± 0.7 | 107.5 ± 4.3 | 539.0 ± 56.4   | 4831.2 ± 1137.2 | 4481.2 ± 777.9  |

Supplementary Table S2. Slice thickness in mm (mean ± standard deviation).

| Scanner  | T1 Thickness | T2 Thickness | STIR Thickness |
|----------|--------------|--------------|----------------|
| Aera     | 2.7 ± 0.5    | 2.7 ± 0.5    | 2.7 ± 0.5      |
| Avanto   | 3.1 ± 0.1    | 3.1 ± 0.1    | 3.1 ± 0.1      |
| Skyra    | 2.8 ± 0.5    | 2.8 ± 0.5    | 2.8 ± 0.5      |
| Sonata   | 2.9 ± 0.4    | 2.9 ± 0.4    | 2.9 ± 0.4      |
| Symphony | 2.8 ± 0.4    | 2.7 ± 0.5    | 2.8 ± 0.4      |

Supplementary Table S3. Pixel spacing in mm (mean ± standard deviation).

| Scanner  | T1 Spacing  | T2 Spacing  | STIR Spacing |
|----------|-------------|-------------|--------------|
| Aera     | 0.66 ± 0.06 | 0.66 ± 0.06 | 0.66 ± 0.07  |
| Avanto   | 0.72 ± 0.05 | 0.72 ± 0.05 | 0.72 ± 0.05  |
| Skyra    | 0.66 ± 0.06 | 0.64 ± 0.07 | 0.66 ± 0.08  |
| Sonata   | 0.73 ± 0.09 | 0.72 ± 0.08 | 0.72 ± 0.08  |
| Symphony | 0.74 ± 0.1  | 0.74 ± 0.1  | 0.74 ± 0.1   |
